# Supplementary material for: Heteroligand Iron(V) Complexes Containing Porphyrazine, trans-Di[benzo]porphyrazine or Tetra[benzo]porphyrazine, Oxo and Fluoro Ligands: DFT Quantum-Chemical Study
Source: MDPI journal article supplement (doi:10.3390/ijms24076442), 2023-03-29
Supplement: s1 [file s1]

# NBO Analysis Data for [FeL1(O)F]

B3PW91/TZVP

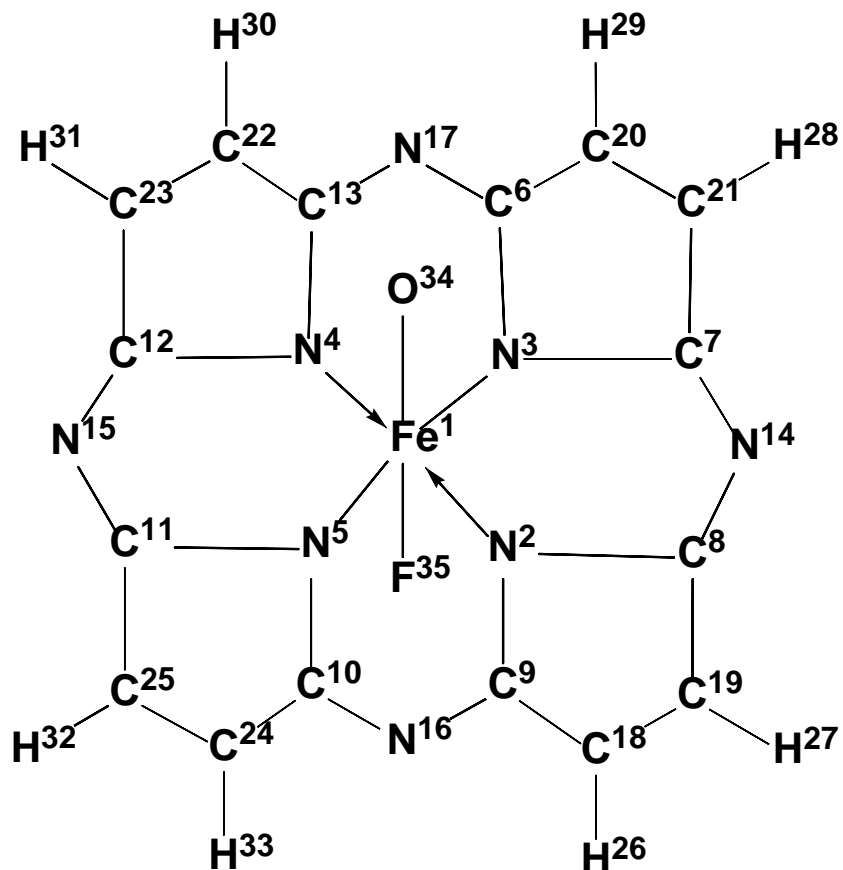

Dipole moment: = 0.8514 Debye

## Mulliken charges and spin densities:

|    |    |           |           |
|----|----|-----------|-----------|
| 1  | Fe | -0.135586 | 1.881296  |
| 2  | N  | 0.135376  | -0.073946 |
| 3  | N  | 0.178366  | -0.041873 |
| 4  | N  | 0.135310  | -0.074019 |
| 5  | N  | 0.178376  | -0.041874 |
| 6  | C  | 0.005106  | 0.002257  |
| 7  | C  | 0.005178  | 0.002259  |
| 8  | C  | 0.012496  | 0.002807  |
| 9  | C  | 0.012508  | 0.002810  |
| 10 | C  | 0.005169  | 0.002263  |
| 11 | C  | 0.005098  | 0.002260  |
| 12 | C  | 0.012510  | 0.002807  |
| 13 | C  | 0.012499  | 0.002804  |
| 14 | N  | -0.005322 | -0.002124 |
| 15 | N  | -0.005305 | -0.002119 |
| 16 | N  | -0.005314 | -0.002126 |
| 17 | N  | -0.005313 | -0.002117 |
| 18 | C  | -0.154987 | 0.002976  |
| 19 | C  | -0.154972 | 0.002979  |
| 20 | C  | -0.159968 | 0.002609  |
| 21 | C  | -0.159982 | 0.002609  |
| 22 | C  | -0.154977 | 0.002952  |
| 23 | C  | -0.154991 | 0.002949  |
| 24 | C  | -0.159979 | 0.002611  |
| 25 | C  | -0.159966 | 0.002611  |
| 26 | H  | 0.140316  | -0.000525 |
| 27 | H  | 0.140316  | -0.000525 |
| 28 | H  | 0.139282  | -0.000368 |
| 29 | H  | 0.139282  | -0.000368 |
| 30 | H  | 0.140318  | -0.000524 |
| 31 | H  | 0.140317  | -0.000524 |
| 32 | H  | 0.139281  | -0.000368 |
| 33 | H  | 0.139281  | -0.000368 |
| 34 | O  | -0.079946 | -0.806256 |
| 35 | F  | -0.319781 | 0.126165  |

Sum of Mulliken charges = -0.00000 1.00000

$\Delta E(\text{multipl.}=2) = 0.0 \text{ кДж/моль}$   
 $\Delta E(\text{multipl.}=4) = 9.4 \text{ кДж/моль}$   
 $\Delta E(\text{multipl.}=6) = 94.1 \text{ кДж/моль}$   
Alpha occupied eigenvalues (highest) = -6.424281 eV  
Alpha virtual eigenvalues (lowest) = -4.4439372 eV  
Beta occupied eigenvalues (highest) = -6.4093155 eV  
Beta virtual eigenvalues (lowest) = -4.2398622 eV

<S\*\*2>= 1.6043

# Summary of Natural Population Analysis:

|      |    | Natural Population |          |         |         |          |
|------|----|--------------------|----------|---------|---------|----------|
| Atom | No | Natural Charge     | Core     | Valence | Rydberg | Total    |
| Fe   | 1  | 0.34191            | 17.99306 | 7.62378 | 0.04126 | 25.65809 |
| N    | 2  | -0.35698           | 1.99916  | 5.33057 | 0.02725 | 7.35698  |
| N    | 3  | -0.36010           | 1.99914  | 5.33375 | 0.02721 | 7.36010  |
| N    | 4  | -0.35698           | 1.99916  | 5.33057 | 0.02726 | 7.35698  |
| N    | 5  | -0.36009           | 1.99914  | 5.33375 | 0.02721 | 7.36009  |
| C    | 6  | 0.35927            | 1.99927  | 3.61836 | 0.02311 | 5.64073  |
| C    | 7  | 0.35926            | 1.99927  | 3.61837 | 0.02311 | 5.64074  |
| C    | 8  | 0.36068            | 1.99926  | 3.61723 | 0.02283 | 5.63932  |
| C    | 9  | 0.36067            | 1.99926  | 3.61724 | 0.02283 | 5.63933  |
| C    | 10 | 0.35925            | 1.99927  | 3.61838 | 0.02311 | 5.64075  |
| C    | 11 | 0.35926            | 1.99927  | 3.61837 | 0.02311 | 5.64074  |
| C    | 12 | 0.36069            | 1.99926  | 3.61722 | 0.02283 | 5.63931  |
| C    | 13 | 0.36070            | 1.99926  | 3.61721 | 0.02283 | 5.63930  |
| N    | 14 | -0.38962           | 1.99934  | 5.37463 | 0.01564 | 7.38962  |
| N    | 15 | -0.38961           | 1.99934  | 5.37463 | 0.01564 | 7.38961  |
| N    | 16 | -0.38961           | 1.99934  | 5.37462 | 0.01564 | 7.38961  |
| N    | 17 | -0.38962           | 1.99934  | 5.37464 | 0.01564 | 7.38962  |
| C    | 18 | -0.20838           | 1.99910  | 4.19588 | 0.01340 | 6.20838  |

|           |    |          |          |           |         |           |
|-----------|----|----------|----------|-----------|---------|-----------|
| C         | 19 | -0.20837 | 1.99910  | 4.19587   | 0.01340 | 6.20837   |
| C         | 20 | -0.20644 | 1.99909  | 4.19399   | 0.01336 | 6.20644   |
| C         | 21 | -0.20644 | 1.99909  | 4.19399   | 0.01336 | 6.20644   |
| C         | 22 | -0.20838 | 1.99910  | 4.19588   | 0.01340 | 6.20838   |
| C         | 23 | -0.20839 | 1.99910  | 4.19589   | 0.01340 | 6.20839   |
| C         | 24 | -0.20645 | 1.99909  | 4.19400   | 0.01336 | 6.20645   |
| C         | 25 | -0.20645 | 1.99909  | 4.19400   | 0.01336 | 6.20645   |
| H         | 26 | 0.23910  | 0.00000  | 0.75952   | 0.00138 | 0.76090   |
| H         | 27 | 0.23910  | 0.00000  | 0.75952   | 0.00138 | 0.76090   |
| H         | 28 | 0.24025  | 0.00000  | 0.75838   | 0.00137 | 0.75975   |
| H         | 29 | 0.24025  | 0.00000  | 0.75838   | 0.00137 | 0.75975   |
| H         | 30 | 0.23909  | 0.00000  | 0.75953   | 0.00138 | 0.76091   |
| H         | 31 | 0.23910  | 0.00000  | 0.75952   | 0.00138 | 0.76090   |
| H         | 32 | 0.24025  | 0.00000  | 0.75838   | 0.00137 | 0.75975   |
| H         | 33 | 0.24025  | 0.00000  | 0.75838   | 0.00137 | 0.75975   |
| O         | 34 | -0.10336 | 1.99994  | 6.09693   | 0.00649 | 8.10336   |
| F         | 35 | -0.38377 | 1.99997  | 7.38018   | 0.00362 | 9.38377   |
| =====     |    |          |          |           |         |           |
| * Total * |    | 0.00000  | 69.97378 | 132.50155 | 0.52467 | 203.00000 |

NATURAL POPULATIONS: Natural atomic orbital occupancies

| NAO   | Atom | No | lang | Type(AO) | Occupancy |
|-------|------|----|------|----------|-----------|
| ----- |      |    |      |          |           |
| 1     | Fe   | 1  | S    | Cor( 1S) | 2.00000   |
| 2     | Fe   | 1  | S    | Cor( 2S) | 1.99999   |
| 3     | Fe   | 1  | S    | Cor( 3S) | 1.99650   |
| 4     | Fe   | 1  | S    | Val( 4S) | 0.30244   |
| 5     | Fe   | 1  | S    | Ryd( 5S) | 0.00153   |
| 6     | Fe   | 1  | S    | Ryd( 6S) | 0.00051   |
| 7     | Fe   | 1  | px   | Cor( 2p) | 2.00000   |
| 8     | Fe   | 1  | px   | Cor( 3p) | 1.99862   |
| 9     | Fe   | 1  | px   | Val( 4p) | 0.26348   |
| 10    | Fe   | 1  | px   | Ryd( 5p) | 0.00076   |
| 11    | Fe   | 1  | py   | Cor( 2p) | 2.00000   |
| 12    | Fe   | 1  | py   | Cor( 3p) | 1.99860   |

|    |    |   |       |          |         |
|----|----|---|-------|----------|---------|
| 13 | Fe | 1 | py    | Val( 4p) | 0.26705 |
| 14 | Fe | 1 | py    | Ryd( 5p) | 0.00075 |
| 15 | Fe | 1 | pz    | Cor( 2p) | 2.00000 |
| 16 | Fe | 1 | pz    | Cor( 3p) | 1.99935 |
| 17 | Fe | 1 | pz    | Val( 4p) | 0.24416 |
| 18 | Fe | 1 | pz    | Ryd( 5p) | 0.00270 |
| 19 | Fe | 1 | dxy   | Val( 3d) | 1.98779 |
| 20 | Fe | 1 | dxy   | Ryd( 4d) | 0.00431 |
| 21 | Fe | 1 | dxy   | Ryd( 5d) | 0.00055 |
| 22 | Fe | 1 | dxz   | Val( 3d) | 1.16337 |
| 23 | Fe | 1 | dxz   | Ryd( 4d) | 0.00620 |
| 24 | Fe | 1 | dxz   | Ryd( 5d) | 0.00011 |
| 25 | Fe | 1 | dyz   | Val( 3d) | 1.25689 |
| 26 | Fe | 1 | dyz   | Ryd( 4d) | 0.01064 |
| 27 | Fe | 1 | dyz   | Ryd( 5d) | 0.00013 |
| 28 | Fe | 1 | dx2y2 | Val( 3d) | 1.04341 |
| 29 | Fe | 1 | dx2y2 | Ryd( 4d) | 0.00523 |
| 30 | Fe | 1 | dx2y2 | Ryd( 5d) | 0.00005 |
| 31 | Fe | 1 | dz2   | Val( 3d) | 1.09519 |
| 32 | Fe | 1 | dz2   | Ryd( 4d) | 0.00765 |
| 33 | Fe | 1 | dz2   | Ryd( 5d) | 0.00014 |

# NBO Analysis Data for [FeL1(O)F]

OPBE/TZVP

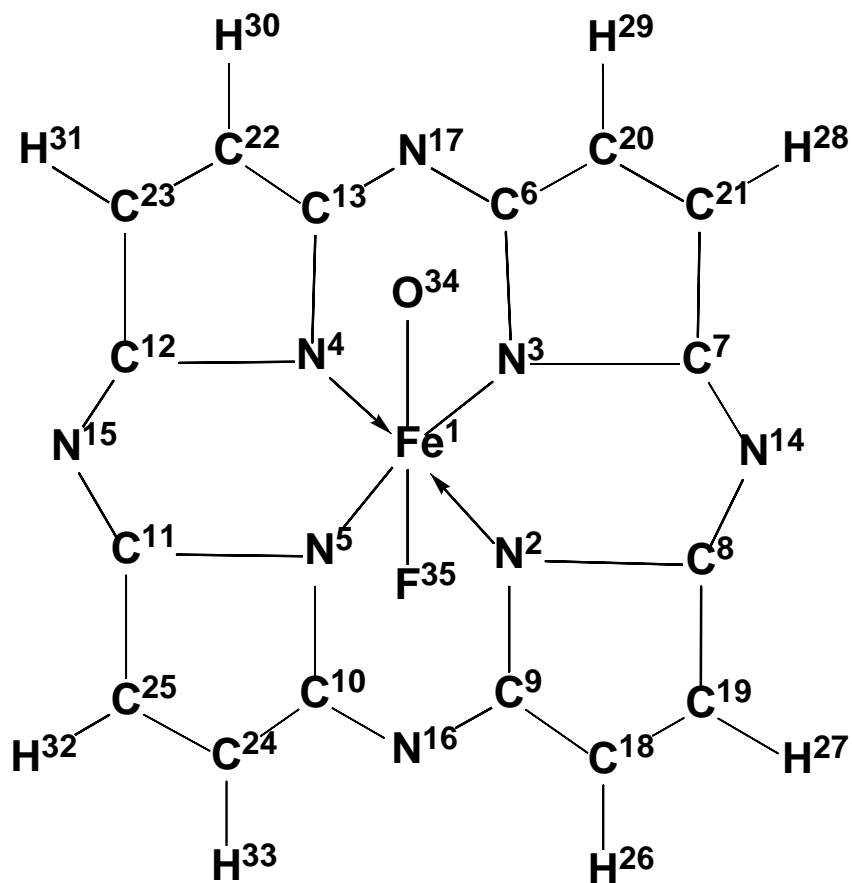

Dipole moment: = 0.7772 Debye

Mulliken charges and spin densities:

|    |    |           |           |
|----|----|-----------|-----------|
| 1  | Fe | -0.380978 | 1.864880  |
| 2  | N  | 0.410835  | -0.032142 |
| 3  | N  | 0.405062  | -0.034112 |
| 4  | N  | 0.410837  | -0.032142 |
| 5  | N  | 0.405063  | -0.034112 |
| 6  | C  | -0.124963 | 0.013590  |
| 7  | C  | -0.124964 | 0.013590  |
| 8  | C  | -0.125640 | 0.013510  |
| 9  | C  | -0.125641 | 0.013510  |
| 10 | C  | -0.124962 | 0.013589  |
| 11 | C  | -0.124964 | 0.013590  |
| 12 | C  | -0.125643 | 0.013510  |
| 13 | C  | -0.125640 | 0.013510  |
| 14 | N  | 0.282051  | 0.037224  |
| 15 | N  | 0.282051  | 0.037224  |
| 16 | N  | 0.282051  | 0.037224  |
| 17 | N  | 0.282051  | 0.037224  |
| 18 | C  | -0.173836 | 0.000676  |
| 19 | C  | -0.173835 | 0.000675  |
| 20 | C  | -0.170369 | 0.000694  |
| 21 | C  | -0.170369 | 0.000693  |
| 22 | C  | -0.173837 | 0.000675  |
| 23 | C  | -0.173834 | 0.000676  |
| 24 | C  | -0.170369 | 0.000694  |
| 25 | C  | -0.170369 | 0.000693  |
| 26 | H  | 0.057903  | 0.001259  |
| 27 | H  | 0.057903  | 0.001259  |
| 28 | H  | 0.057594  | 0.001052  |
| 29 | H  | 0.057594  | 0.001052  |
| 30 | H  | 0.057903  | 0.001259  |
| 31 | H  | 0.057903  | 0.001259  |
| 32 | H  | 0.057593  | 0.001052  |
| 33 | H  | 0.057593  | 0.001052  |
| 34 | O  | -0.110264 | 0.952265  |
| 35 | F  | -0.351512 | 0.043349  |

Sum of Mulliken charges = -0.00000 3.00000

$\Delta E(\text{multipl.}=2) = 5.5 \text{ кДж/моль}$   
 $\Delta E(\text{multipl.}=4) = 0.0 \text{ кДж/моль}$   
 $\Delta E(\text{multipl.}=6) = 133.6 \text{ кДж/моль}$   
Alpha occupied eigenvalues (highest) = -5.8945023 eV  
Alpha virtual eigenvalues (lowest) = -4.0910235 eV  
Beta occupied eigenvalues (highest) = -6.0177636 eV  
Beta virtual eigenvalues (lowest) = -5.6338305 eV

<S\*\*2>= 3.7919

# Summary of Natural Population Analysis:

| Natural Population |    |                |          |         |         |          |
|--------------------|----|----------------|----------|---------|---------|----------|
| Atom               | No | Natural Charge | Core     | Valence | Rydberg | Total    |
| Fe                 | 1  | 0.25285        | 17.99161 | 7.72080 | 0.03473 | 25.74715 |
| N                  | 2  | -0.30431       | 1.99915  | 5.27794 | 0.02722 | 7.30431  |
| N                  | 3  | -0.30513       | 1.99915  | 5.27875 | 0.02722 | 7.30513  |
| N                  | 4  | -0.30431       | 1.99915  | 5.27793 | 0.02722 | 7.30431  |
| N                  | 5  | -0.30513       | 1.99915  | 5.27875 | 0.02722 | 7.30513  |
| C                  | 6  | 0.33974        | 1.99927  | 3.64034 | 0.02065 | 5.66026  |
| C                  | 7  | 0.33974        | 1.99927  | 3.64034 | 0.02065 | 5.66026  |
| C                  | 8  | 0.33845        | 1.99927  | 3.64164 | 0.02064 | 5.66155  |
| C                  | 9  | 0.33845        | 1.99927  | 3.64164 | 0.02064 | 5.66155  |
| C                  | 10 | 0.33974        | 1.99927  | 3.64034 | 0.02065 | 5.66026  |
| C                  | 11 | 0.33974        | 1.99927  | 3.64034 | 0.02065 | 5.66026  |
| C                  | 12 | 0.33845        | 1.99927  | 3.64164 | 0.02064 | 5.66155  |
| C                  | 13 | 0.33845        | 1.99927  | 3.64164 | 0.02064 | 5.66155  |
| N                  | 14 | -0.34012       | 1.99932  | 5.32627 | 0.01452 | 7.34012  |
| N                  | 15 | -0.34012       | 1.99932  | 5.32627 | 0.01452 | 7.34012  |
| N                  | 16 | -0.34012       | 1.99932  | 5.32627 | 0.01452 | 7.34012  |
| N                  | 17 | -0.34012       | 1.99932  | 5.32627 | 0.01452 | 7.34012  |
| C                  | 18 | -0.21701       | 1.99910  | 4.20633 | 0.01158 | 6.21701  |
| C                  | 19 | -0.21701       | 1.99910  | 4.20633 | 0.01158 | 6.21701  |
| C                  | 20 | -0.21695       | 1.99910  | 4.20628 | 0.01156 | 6.21695  |

|           |    |          |          |           |         |           |
|-----------|----|----------|----------|-----------|---------|-----------|
| C         | 21 | -0.21695 | 1.99910  | 4.20628   | 0.01156 | 6.21695   |
| C         | 22 | -0.21701 | 1.99910  | 4.20633   | 0.01158 | 6.21701   |
| C         | 23 | -0.21701 | 1.99910  | 4.20633   | 0.01158 | 6.21701   |
| C         | 24 | -0.21695 | 1.99910  | 4.20628   | 0.01156 | 6.21695   |
| C         | 25 | -0.21695 | 1.99910  | 4.20628   | 0.01156 | 6.21695   |
| H         | 26 | 0.24577  | 0.00000  | 0.75269   | 0.00154 | 0.75423   |
| H         | 27 | 0.24577  | 0.00000  | 0.75269   | 0.00154 | 0.75423   |
| H         | 28 | 0.24579  | 0.00000  | 0.75266   | 0.00154 | 0.75421   |
| H         | 29 | 0.24579  | 0.00000  | 0.75266   | 0.00154 | 0.75421   |
| H         | 30 | 0.24577  | 0.00000  | 0.75269   | 0.00154 | 0.75423   |
| H         | 31 | 0.24577  | 0.00000  | 0.75269   | 0.00154 | 0.75423   |
| H         | 32 | 0.24579  | 0.00000  | 0.75266   | 0.00154 | 0.75421   |
| H         | 33 | 0.24579  | 0.00000  | 0.75266   | 0.00154 | 0.75421   |
| O         | 34 | -0.17201 | 1.99994  | 6.16579   | 0.00628 | 8.17201   |
| F         | 35 | -0.44469 | 1.99998  | 7.44207   | 0.00264 | 9.44469   |
| =====     |    |          |          |           |         |           |
| * Total * |    | -0.00000 | 69.97242 | 132.54691 | 0.48067 | 203.00000 |

NATURAL POPULATIONS: Natural atomic orbital occupancies

| NAO   | Atom | No | lang | Type(AO) | Occupancy |
|-------|------|----|------|----------|-----------|
| ----- |      |    |      |          |           |
| 1     | Fe   | 1  | S    | Cor( 1S) | 2.00000   |
| 2     | Fe   | 1  | S    | Cor( 2S) | 2.00000   |
| 3     | Fe   | 1  | S    | Cor( 3S) | 1.99627   |
| 4     | Fe   | 1  | S    | Val( 4S) | 0.29836   |
| 5     | Fe   | 1  | S    | Ryd( 5S) | 0.00187   |
| 6     | Fe   | 1  | S    | Ryd( 6S) | 0.00049   |
| 7     | Fe   | 1  | px   | Cor( 2p) | 2.00000   |
| 8     | Fe   | 1  | px   | Cor( 3p) | 1.99849   |
| 9     | Fe   | 1  | px   | Val( 4p) | 0.25947   |
| 10    | Fe   | 1  | px   | Ryd( 5p) | 0.00082   |
| 11    | Fe   | 1  | py   | Cor( 2p) | 2.00000   |
| 12    | Fe   | 1  | py   | Cor( 3p) | 1.99847   |
| 13    | Fe   | 1  | py   | Val( 4p) | 0.25875   |
| 14    | Fe   | 1  | py   | Ryd( 5p) | 0.00076   |
| 15    | Fe   | 1  | pz   | Cor( 2p) | 2.00000   |

|    |    |   |       |          |         |
|----|----|---|-------|----------|---------|
| 16 | Fe | 1 | pz    | Cor( 3p) | 1.99839 |
| 17 | Fe | 1 | pz    | Val( 4p) | 0.23918 |
| 18 | Fe | 1 | pz    | Ryd( 5p) | 0.00216 |
| 19 | Fe | 1 | dxy   | Val( 3d) | 1.33806 |
| 20 | Fe | 1 | dxy   | Ryd( 4d) | 0.00359 |
| 21 | Fe | 1 | dxy   | Ryd( 5d) | 0.00050 |
| 22 | Fe | 1 | dxz   | Val( 3d) | 1.52684 |
| 23 | Fe | 1 | dxz   | Ryd( 4d) | 0.00695 |
| 24 | Fe | 1 | dxz   | Ryd( 5d) | 0.00014 |
| 25 | Fe | 1 | dyz   | Val( 3d) | 1.53245 |
| 26 | Fe | 1 | dyz   | Ryd( 4d) | 0.00672 |
| 27 | Fe | 1 | dyz   | Ryd( 5d) | 0.00014 |
| 28 | Fe | 1 | dx2y2 | Val( 3d) | 1.12878 |
| 29 | Fe | 1 | dx2y2 | Ryd( 4d) | 0.00406 |
| 30 | Fe | 1 | dx2y2 | Ryd( 5d) | 0.00005 |
| 31 | Fe | 1 | dz2   | Val( 3d) | 1.13893 |
| 32 | Fe | 1 | dz2   | Ryd( 4d) | 0.00641 |
| 33 | Fe | 1 | dz2   | Ryd( 5d) | 0.00006 |



# NBO Analysis Data for [FeL2(O)F]

B3PW91/TZVP

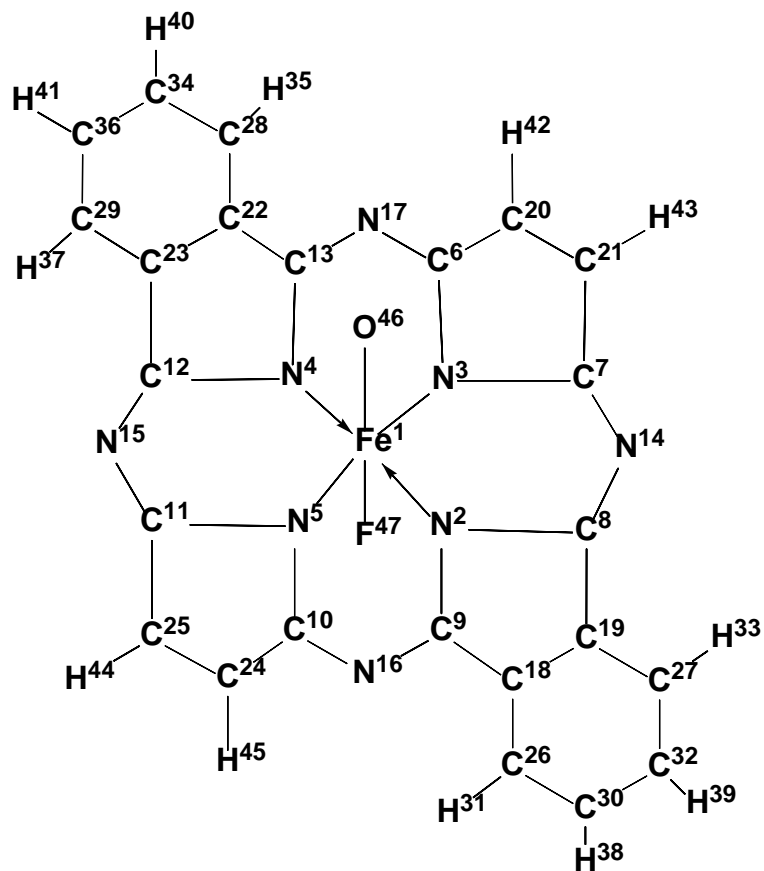

Dipole moment: = 0.4184 Debye

## Mulliken charges and spin densities:

|    |    |           |           |
|----|----|-----------|-----------|
| 1  | Fe | 0.040388  | 1.196631  |
| 2  | N  | 0.175681  | -0.075659 |
| 3  | N  | 0.174797  | -0.073794 |
| 4  | N  | 0.175693  | -0.075663 |
| 5  | N  | 0.174804  | -0.073800 |
| 6  | C  | 0.025642  | 0.163818  |
| 7  | C  | 0.025638  | 0.163811  |
| 8  | C  | -0.018220 | 0.161780  |
| 9  | C  | -0.018215 | 0.161788  |
| 10 | C  | 0.025644  | 0.163825  |
| 11 | C  | 0.025638  | 0.163833  |
| 12 | C  | -0.018219 | 0.161798  |
| 13 | C  | -0.018215 | 0.161789  |
| 14 | N  | -0.027912 | -0.072124 |
| 15 | N  | -0.027908 | -0.072132 |
| 16 | N  | -0.027910 | -0.072128 |
| 17 | N  | -0.027911 | -0.072127 |
| 18 | C  | 0.038839  | -0.029557 |
| 19 | C  | 0.038841  | -0.029553 |
| 20 | C  | -0.184366 | 0.016877  |
| 21 | C  | -0.184358 | 0.016886  |
| 22 | C  | 0.038837  | -0.029555 |
| 23 | C  | 0.038843  | -0.029559 |
| 24 | C  | -0.184365 | 0.016889  |
| 25 | C  | -0.184361 | 0.016878  |
| 26 | C  | -0.146192 | 0.047272  |
| 27 | C  | -0.146189 | 0.047268  |
| 28 | C  | -0.146189 | 0.047271  |
| 29 | C  | -0.146191 | 0.047275  |
| 30 | C  | -0.071713 | 0.012948  |
| 31 | H  | 0.126822  | -0.001632 |
| 32 | C  | -0.071714 | 0.012953  |
| 33 | H  | 0.126822  | -0.001632 |
| 34 | C  | -0.071714 | 0.012954  |
| 35 | H  | 0.126822  | -0.001632 |
| 36 | C  | -0.071713 | 0.012949  |
| 37 | H  | 0.126822  | -0.001632 |
| 38 | H  | 0.121022  | -0.001154 |
| 39 | H  | 0.121022  | -0.001155 |
| 40 | H  | 0.121022  | -0.001155 |
| 41 | H  | 0.121022  | -0.001155 |
| 42 | H  | 0.138844  | -0.001534 |
| 43 | H  | 0.138844  | -0.001535 |
| 44 | H  | 0.138844  | -0.001535 |
| 45 | H  | 0.138844  | -0.001535 |
| 46 | O  | -0.278840 | 0.891349  |
| 47 | F  | -0.473623 | 0.024096  |

Sum of Mulliken charges = -0.00000 3.00000

$\Delta E(\text{multipl.}=2) = 49.9 \text{ кДж/моль}$   
 $\Delta E(\text{multipl.}=4) = 0.0 \text{ кДж/моль}$   
 $\Delta E(\text{multipl.}=6) = 77.2 \text{ кДж/моль}$   
Alpha occupied eigenvalues (highest) = -6.1913634 eV  
Alpha virtual eigenvalues (lowest) = -3.6292698 eV  
Beta occupied eigenvalues (highest) = -6.4299951 eV  
Beta virtual eigenvalues (lowest) = -4.9524921 eV

<S\*\*2>= 3.7999

# Summary of Natural Population Analysis:

|      |    | Natural Population |          |         |         |          |
|------|----|--------------------|----------|---------|---------|----------|
| Atom | No | Natural Charge     | Core     | Valence | Rydberg | Total    |
| Fe   | 1  | 0.43293            | 17.99234 | 7.53464 | 0.04010 | 25.56707 |
| N    | 2  | -0.33454           | 1.99914  | 5.30764 | 0.02777 | 7.33454  |
| N    | 3  | -0.36034           | 1.99909  | 5.33376 | 0.02749 | 7.36034  |
| N    | 4  | -0.33454           | 1.99914  | 5.30763 | 0.02777 | 7.33454  |
| N    | 5  | -0.36034           | 1.99909  | 5.33376 | 0.02749 | 7.36034  |
| C    | 6  | 0.36252            | 1.99929  | 3.61495 | 0.02325 | 5.63748  |
| C    | 7  | 0.36252            | 1.99929  | 3.61495 | 0.02325 | 5.63748  |
| C    | 8  | 0.39038            | 1.99921  | 3.58807 | 0.02234 | 5.60962  |
| C    | 9  | 0.39038            | 1.99921  | 3.58807 | 0.02234 | 5.60962  |
| C    | 10 | 0.36251            | 1.99929  | 3.61495 | 0.02325 | 5.63749  |
| C    | 11 | 0.36251            | 1.99929  | 3.61495 | 0.02325 | 5.63749  |
| C    | 12 | 0.39038            | 1.99921  | 3.58807 | 0.02234 | 5.60962  |
| C    | 13 | 0.39038            | 1.99921  | 3.58807 | 0.02234 | 5.60962  |
| N    | 14 | -0.39926           | 1.99934  | 5.38473 | 0.01519 | 7.39926  |
| N    | 15 | -0.39925           | 1.99934  | 5.38472 | 0.01519 | 7.39925  |
| N    | 16 | -0.39926           | 1.99934  | 5.38473 | 0.01519 | 7.39926  |
| N    | 17 | -0.39926           | 1.99934  | 5.38473 | 0.01519 | 7.39926  |
| C    | 18 | -0.07459           | 1.99901  | 4.05839 | 0.01719 | 6.07459  |

|           |    |          |          |           |         |           |
|-----------|----|----------|----------|-----------|---------|-----------|
| C         | 19 | -0.07459 | 1.99901  | 4.05839   | 0.01719 | 6.07459   |
| C         | 20 | -0.21322 | 1.99907  | 4.20082   | 0.01333 | 6.21322   |
| C         | 21 | -0.21322 | 1.99907  | 4.20082   | 0.01333 | 6.21322   |
| C         | 22 | -0.07459 | 1.99901  | 4.05839   | 0.01719 | 6.07459   |
| C         | 23 | -0.07459 | 1.99901  | 4.05839   | 0.01719 | 6.07459   |
| C         | 24 | -0.21322 | 1.99907  | 4.20083   | 0.01333 | 6.21322   |
| C         | 25 | -0.21322 | 1.99907  | 4.20083   | 0.01333 | 6.21322   |
| C         | 26 | -0.16687 | 1.99911  | 4.15409   | 0.01366 | 6.16687   |
| C         | 27 | -0.16687 | 1.99911  | 4.15409   | 0.01366 | 6.16687   |
| C         | 28 | -0.16687 | 1.99911  | 4.15409   | 0.01366 | 6.16687   |
| C         | 29 | -0.16687 | 1.99911  | 4.15409   | 0.01366 | 6.16687   |
| C         | 30 | -0.19900 | 1.99925  | 4.18582   | 0.01393 | 6.19900   |
| H         | 31 | 0.23390  | 0.00000  | 0.76447   | 0.00163 | 0.76610   |
| C         | 32 | -0.19900 | 1.99925  | 4.18582   | 0.01393 | 6.19900   |
| H         | 33 | 0.23390  | 0.00000  | 0.76447   | 0.00163 | 0.76610   |
| C         | 34 | -0.19900 | 1.99925  | 4.18582   | 0.01393 | 6.19900   |
| H         | 35 | 0.23390  | 0.00000  | 0.76447   | 0.00163 | 0.76610   |
| C         | 36 | -0.19900 | 1.99925  | 4.18582   | 0.01393 | 6.19900   |
| H         | 37 | 0.23390  | 0.00000  | 0.76447   | 0.00163 | 0.76610   |
| H         | 38 | 0.21924  | 0.00000  | 0.77965   | 0.00111 | 0.78076   |
| H         | 39 | 0.21924  | 0.00000  | 0.77965   | 0.00111 | 0.78076   |
| H         | 40 | 0.21924  | 0.00000  | 0.77965   | 0.00111 | 0.78076   |
| H         | 41 | 0.21924  | 0.00000  | 0.77965   | 0.00111 | 0.78076   |
| H         | 42 | 0.23915  | 0.00000  | 0.75946   | 0.00139 | 0.76085   |
| H         | 43 | 0.23915  | 0.00000  | 0.75946   | 0.00139 | 0.76085   |
| H         | 44 | 0.23915  | 0.00000  | 0.75946   | 0.00139 | 0.76085   |
| H         | 45 | 0.23915  | 0.00000  | 0.75946   | 0.00139 | 0.76085   |
| O         | 46 | -0.12349 | 1.99993  | 6.11658   | 0.00698 | 8.12349   |
| F         | 47 | -0.48870 | 1.99998  | 7.48604   | 0.00268 | 9.48870   |
| =====     |    |          |          |           |         |           |
| * Total * |    | 0.00000  | 85.96584 | 168.38181 | 0.65236 | 255.00000 |

NATURAL POPULATIONS: Natural atomic orbital occupancies

| NAO   | Atom | No | lang | Type(AO) | Occupancy |
|-------|------|----|------|----------|-----------|
| ----- |      |    |      |          |           |

|    |    |   |       |          |         |
|----|----|---|-------|----------|---------|
| 1  | Fe | 1 | s     | Cor( 1s) | 2.00000 |
| 2  | Fe | 1 | s     | Cor( 2s) | 1.99999 |
| 3  | Fe | 1 | s     | Cor( 3s) | 1.99657 |
| 4  | Fe | 1 | s     | Val( 4s) | 0.30115 |
| 5  | Fe | 1 | s     | Ryd( 5s) | 0.00131 |
| 6  | Fe | 1 | s     | Ryd( 6s) | 0.00057 |
| 7  | Fe | 1 | px    | Cor( 2p) | 2.00000 |
| 8  | Fe | 1 | px    | Cor( 3p) | 1.99869 |
| 9  | Fe | 1 | px    | Val( 4p) | 0.26332 |
| 10 | Fe | 1 | px    | Ryd( 5p) | 0.00053 |
| 11 | Fe | 1 | py    | Cor( 2p) | 2.00000 |
| 12 | Fe | 1 | py    | Cor( 3p) | 1.99869 |
| 13 | Fe | 1 | py    | Val( 4p) | 0.26632 |
| 14 | Fe | 1 | py    | Ryd( 5p) | 0.00079 |
| 15 | Fe | 1 | pz    | Cor( 2p) | 2.00000 |
| 16 | Fe | 1 | pz    | Cor( 3p) | 1.99840 |
| 17 | Fe | 1 | pz    | Val( 4p) | 0.24333 |
| 18 | Fe | 1 | pz    | Ryd( 5p) | 0.00235 |
| 19 | Fe | 1 | dxy   | Val( 3d) | 1.07480 |
| 20 | Fe | 1 | dxy   | Ryd( 4d) | 0.00475 |
| 21 | Fe | 1 | dxy   | Ryd( 5d) | 0.00071 |
| 22 | Fe | 1 | dxz   | Val( 3d) | 1.58792 |
| 23 | Fe | 1 | dxz   | Ryd( 4d) | 0.00790 |
| 24 | Fe | 1 | dxz   | Ryd( 5d) | 0.00014 |
| 25 | Fe | 1 | dyz   | Val( 3d) | 1.58080 |
| 26 | Fe | 1 | dyz   | Ryd( 4d) | 0.00793 |
| 27 | Fe | 1 | dyz   | Ryd( 5d) | 0.00014 |
| 28 | Fe | 1 | dx2y2 | Val( 3d) | 1.14019 |
| 29 | Fe | 1 | dx2y2 | Ryd( 4d) | 0.00520 |
| 30 | Fe | 1 | dx2y2 | Ryd( 5d) | 0.00004 |
| 31 | Fe | 1 | dz2   | Val( 3d) | 1.07681 |
| 32 | Fe | 1 | dz2   | Ryd( 4d) | 0.00766 |
| 33 | Fe | 1 | dz2   | Ryd( 5d) | 0.00010 |

# NBO Analysis Data for [FeL2(O)F]

OPBE/TZVP

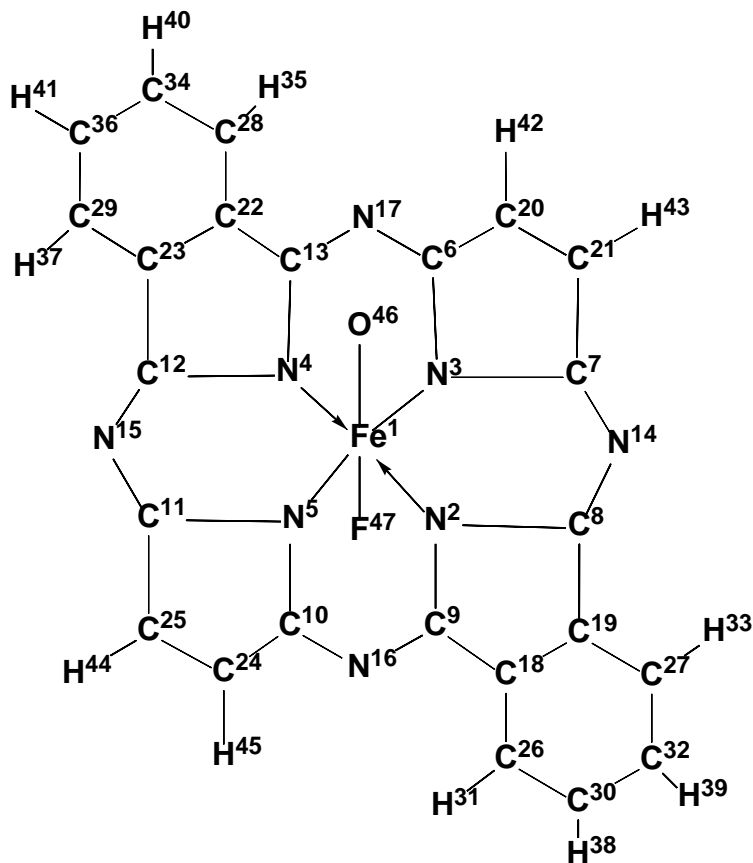

Dipole moment: = 0.3468 Debye

Mulliken charges and spin densities:

|                           |    |           |           |
|---------------------------|----|-----------|-----------|
| 1                         | Fe | -0.332938 | 1.686941  |
| 2                         | N  | 0.419547  | -0.045321 |
| 3                         | N  | 0.410080  | -0.041986 |
| 4                         | N  | 0.419560  | -0.045321 |
| 5                         | N  | 0.410094  | -0.041987 |
| 6                         | C  | -0.112933 | 0.047752  |
| 7                         | C  | -0.112949 | 0.047754  |
| 8                         | C  | -0.206623 | 0.046298  |
| 9                         | C  | -0.206629 | 0.046299  |
| 10                        | C  | -0.112929 | 0.047754  |
| 11                        | C  | -0.112948 | 0.047751  |
| 12                        | C  | -0.206618 | 0.046296  |
| 13                        | C  | -0.206623 | 0.046296  |
| 14                        | N  | 0.268475  | 0.014361  |
| 15                        | N  | 0.268475  | 0.014361  |
| 16                        | N  | 0.268474  | 0.014360  |
| 17                        | N  | 0.268475  | 0.014361  |
| 18                        | C  | 0.228716  | -0.010687 |
| 19                        | C  | 0.228712  | -0.010688 |
| 20                        | C  | -0.207943 | 0.007081  |
| 21                        | C  | -0.207921 | 0.007075  |
| 22                        | C  | 0.228712  | -0.010688 |
| 23                        | C  | 0.228712  | -0.010687 |
| 24                        | C  | -0.207945 | 0.007077  |
| 25                        | C  | -0.207927 | 0.007079  |
| 26                        | C  | -0.341156 | 0.018415  |
| 27                        | C  | -0.341154 | 0.018415  |
| 28                        | C  | -0.341156 | 0.018415  |
| 29                        | C  | -0.341159 | 0.018414  |
| 30                        | C  | -0.012215 | 0.004527  |
| 31                        | H  | 0.062566  | -0.000687 |
| 32                        | C  | -0.012217 | 0.004527  |
| 33                        | H  | 0.062567  | -0.000687 |
| 34                        | C  | -0.012217 | 0.004526  |
| 35                        | H  | 0.062566  | -0.000687 |
| 36                        | C  | -0.012215 | 0.004527  |
| 37                        | H  | 0.062566  | -0.000687 |
| 38                        | H  | 0.062599  | -0.000498 |
| 39                        | H  | 0.062599  | -0.000498 |
| 40                        | H  | 0.062599  | -0.000498 |
| 41                        | H  | 0.062599  | -0.000498 |
| 42                        | H  | 0.053497  | 0.000159  |
| 43                        | H  | 0.053497  | 0.000159  |
| 44                        | H  | 0.053497  | 0.000159  |
| 45                        | H  | 0.053497  | 0.000159  |
| 46                        | O  | -0.137996 | 0.935075  |
| 47                        | F  | -0.368272 | 0.045732  |
| Sum of Mulliken charges = |    | -0.00000  | 3.00000   |

$\Delta E(\text{multipl.}=2) = 2.7 \text{ кДж/моль}$   
 $\Delta E(\text{multipl.}=4) = 0.0 \text{ кДж/моль}$   
 $\Delta E(\text{multipl.}=6) = 107.1 \text{ кДж/моль}$   
Alpha occupied eigenvalues (highest) = -5.4248577 eV  
Alpha virtual eigenvalues (lowest) = -3.9816393 eV  
Beta occupied eigenvalues (highest) = -5.537235 eV  
Beta virtual eigenvalues (lowest) = -5.2322109 eV

<S\*\*2>= 3.7877

# Summary of Natural Population Analysis:

| Natural Population |    |                |          |         |         |          |
|--------------------|----|----------------|----------|---------|---------|----------|
| Atom               | No | Natural Charge | Core     | Valence | Rydberg | Total    |
| Fe                 | 1  | 0.21168        | 17.99147 | 7.76335 | 0.03350 | 25.78832 |
| N                  | 2  | -0.28273       | 1.99919  | 5.25640 | 0.02714 | 7.28273  |
| N                  | 3  | -0.31000       | 1.99916  | 5.28422 | 0.02663 | 7.31000  |
| N                  | 4  | -0.28273       | 1.99919  | 5.25640 | 0.02714 | 7.28273  |
| N                  | 5  | -0.31000       | 1.99916  | 5.28421 | 0.02663 | 7.31000  |
| C                  | 6  | 0.35100        | 1.99928  | 3.62888 | 0.02084 | 5.64900  |
| C                  | 7  | 0.35100        | 1.99928  | 3.62888 | 0.02084 | 5.64900  |
| C                  | 8  | 0.38355        | 1.99921  | 3.59701 | 0.02024 | 5.61645  |
| C                  | 9  | 0.38355        | 1.99921  | 3.59701 | 0.02024 | 5.61645  |
| C                  | 10 | 0.35100        | 1.99928  | 3.62888 | 0.02084 | 5.64900  |
| C                  | 11 | 0.35100        | 1.99928  | 3.62888 | 0.02084 | 5.64900  |
| C                  | 12 | 0.38355        | 1.99921  | 3.59701 | 0.02024 | 5.61645  |
| C                  | 13 | 0.38355        | 1.99921  | 3.59701 | 0.02024 | 5.61645  |
| N                  | 14 | -0.36513       | 1.99933  | 5.35117 | 0.01464 | 7.36513  |
| N                  | 15 | -0.36513       | 1.99933  | 5.35117 | 0.01464 | 7.36513  |
| N                  | 16 | -0.36513       | 1.99933  | 5.35117 | 0.01464 | 7.36513  |
| N                  | 17 | -0.36513       | 1.99933  | 5.35117 | 0.01464 | 7.36513  |
| C                  | 18 | -0.07927       | 1.99904  | 4.06465 | 0.01558 | 6.07927  |
| C                  | 19 | -0.07927       | 1.99904  | 4.06465 | 0.01558 | 6.07927  |
| C                  | 20 | -0.21995       | 1.99910  | 4.20922 | 0.01163 | 6.21995  |

|           |    |          |          |           |         |           |
|-----------|----|----------|----------|-----------|---------|-----------|
| C         | 21 | -0.21995 | 1.99910  | 4.20922   | 0.01163 | 6.21995   |
| C         | 22 | -0.07927 | 1.99904  | 4.06465   | 0.01558 | 6.07927   |
| C         | 23 | -0.07927 | 1.99904  | 4.06465   | 0.01558 | 6.07927   |
| C         | 24 | -0.21995 | 1.99910  | 4.20922   | 0.01163 | 6.21995   |
| C         | 25 | -0.21995 | 1.99910  | 4.20922   | 0.01163 | 6.21995   |
| C         | 26 | -0.16699 | 1.99913  | 4.15608   | 0.01177 | 6.16699   |
| C         | 27 | -0.16699 | 1.99913  | 4.15608   | 0.01177 | 6.16699   |
| C         | 28 | -0.16699 | 1.99913  | 4.15608   | 0.01177 | 6.16699   |
| C         | 29 | -0.16699 | 1.99913  | 4.15608   | 0.01177 | 6.16699   |
| C         | 30 | -0.20371 | 1.99926  | 4.19272   | 0.01173 | 6.20371   |
| H         | 31 | 0.23900  | 0.00000  | 0.75918   | 0.00182 | 0.76100   |
| C         | 32 | -0.20371 | 1.99926  | 4.19272   | 0.01173 | 6.20371   |
| H         | 33 | 0.23900  | 0.00000  | 0.75918   | 0.00182 | 0.76100   |
| C         | 34 | -0.20371 | 1.99926  | 4.19272   | 0.01173 | 6.20371   |
| H         | 35 | 0.23900  | 0.00000  | 0.75918   | 0.00182 | 0.76100   |
| C         | 36 | -0.20371 | 1.99926  | 4.19272   | 0.01173 | 6.20371   |
| H         | 37 | 0.23900  | 0.00000  | 0.75918   | 0.00182 | 0.76100   |
| H         | 38 | 0.22547  | 0.00000  | 0.77330   | 0.00123 | 0.77453   |
| H         | 39 | 0.22547  | 0.00000  | 0.77330   | 0.00123 | 0.77453   |
| H         | 40 | 0.22547  | 0.00000  | 0.77330   | 0.00123 | 0.77453   |
| H         | 41 | 0.22547  | 0.00000  | 0.77330   | 0.00123 | 0.77453   |
| H         | 42 | 0.24312  | 0.00000  | 0.75529   | 0.00159 | 0.75688   |
| H         | 43 | 0.24312  | 0.00000  | 0.75529   | 0.00159 | 0.75688   |
| H         | 44 | 0.24312  | 0.00000  | 0.75529   | 0.00159 | 0.75688   |
| H         | 45 | 0.24312  | 0.00000  | 0.75529   | 0.00159 | 0.75688   |
| O         | 46 | -0.19641 | 1.99994  | 6.19037   | 0.00611 | 8.19641   |
| F         | 47 | -0.45819 | 1.99998  | 7.45582   | 0.00239 | 9.45819   |
| =====     |    |          |          |           |         |           |
| * Total * |    | 0.00000  | 85.96544 | 168.44076 | 0.59380 | 255.00000 |

NATURAL POPULATIONS: Natural atomic orbital occupancies

| NAO   | Atom | No | lang | Type(AO) | Occupancy |
|-------|------|----|------|----------|-----------|
| ----- |      |    |      |          |           |
| 1     | Fe   | 1  | S    | Cor( 1S) | 2.00000   |
| 2     | Fe   | 1  | S    | Cor( 2S) | 2.00000   |

|    |    |   |       |          |         |
|----|----|---|-------|----------|---------|
| 3  | Fe | 1 | s     | Cor( 3s) | 1.99622 |
| 4  | Fe | 1 | s     | Val( 4s) | 0.29335 |
| 5  | Fe | 1 | s     | Ryd( 5s) | 0.00155 |
| 6  | Fe | 1 | s     | Ryd( 6s) | 0.00057 |
| 7  | Fe | 1 | px    | Cor( 2p) | 2.00000 |
| 8  | Fe | 1 | px    | Cor( 3p) | 1.99845 |
| 9  | Fe | 1 | px    | Val( 4p) | 0.25260 |
| 10 | Fe | 1 | px    | Ryd( 5p) | 0.00053 |
| 11 | Fe | 1 | py    | Cor( 2p) | 2.00000 |
| 12 | Fe | 1 | py    | Cor( 3p) | 1.99848 |
| 13 | Fe | 1 | py    | Val( 4p) | 0.25649 |
| 14 | Fe | 1 | py    | Ryd( 5p) | 0.00083 |
| 15 | Fe | 1 | pz    | Cor( 2p) | 2.00000 |
| 16 | Fe | 1 | pz    | Cor( 3p) | 1.99834 |
| 17 | Fe | 1 | pz    | Val( 4p) | 0.23539 |
| 18 | Fe | 1 | pz    | Ryd( 5p) | 0.00213 |
| 19 | Fe | 1 | dxy   | Val( 3d) | 1.51059 |
| 20 | Fe | 1 | dxy   | Ryd( 4d) | 0.00362 |
| 21 | Fe | 1 | dxy   | Ryd( 5d) | 0.00052 |
| 22 | Fe | 1 | dxz   | Val( 3d) | 1.51294 |
| 23 | Fe | 1 | dxz   | Ryd( 4d) | 0.00664 |
| 24 | Fe | 1 | dxz   | Ryd( 5d) | 0.00014 |
| 25 | Fe | 1 | dyz   | Val( 3d) | 1.50860 |
| 26 | Fe | 1 | dyz   | Ryd( 4d) | 0.00696 |
| 27 | Fe | 1 | dyz   | Ryd( 5d) | 0.00015 |
| 28 | Fe | 1 | dx2y2 | Val( 3d) | 1.07396 |
| 29 | Fe | 1 | dx2y2 | Ryd( 4d) | 0.00358 |
| 30 | Fe | 1 | dx2y2 | Ryd( 5d) | 0.00006 |
| 31 | Fe | 1 | dz2   | Val( 3d) | 1.11942 |
| 32 | Fe | 1 | dz2   | Ryd( 4d) | 0.00615 |
| 33 | Fe | 1 | dz2   | Ryd( 5d) | 0.00007 |



# NBO Analysis Data for [FeL3(O)F]

B3PW91/TZVP

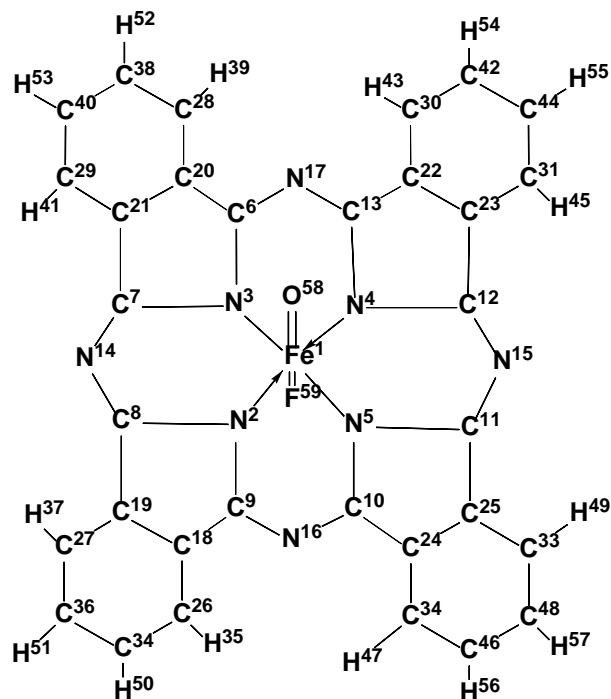

Dipole moment: = 0.4198 Debye

Mulliken charges and spin densities:

|                           |    |           |           |
|---------------------------|----|-----------|-----------|
| 1                         | Fe | 0.052951  | 1.198107  |
| 2                         | N  | 0.180677  | -0.072814 |
| 3                         | N  | 0.180670  | -0.072814 |
| 4                         | N  | 0.180676  | -0.072814 |
| 5                         | N  | 0.180669  | -0.072815 |
| 6                         | C  | 0.016555  | 0.156946  |
| 7                         | C  | 0.016553  | 0.156945  |
| 8                         | C  | 0.016556  | 0.156944  |
| 9                         | C  | 0.016557  | 0.156944  |
| 10                        | C  | 0.016554  | 0.156946  |
| 11                        | C  | 0.016554  | 0.156946  |
| 12                        | C  | 0.016557  | 0.156945  |
| 13                        | C  | 0.016555  | 0.156945  |
| 14                        | N  | -0.040381 | -0.067533 |
| 15                        | N  | -0.040381 | -0.067533 |
| 16                        | N  | -0.040381 | -0.067533 |
| 17                        | N  | -0.040381 | -0.067533 |
| 18                        | C  | -0.022649 | -0.025528 |
| 19                        | C  | -0.022648 | -0.025527 |
| 20                        | C  | -0.022647 | -0.025527 |
| 21                        | C  | -0.022647 | -0.025528 |
| 22                        | C  | -0.022648 | -0.025528 |
| 23                        | C  | -0.022648 | -0.025528 |
| 24                        | C  | -0.022646 | -0.025527 |
| 25                        | C  | -0.022647 | -0.025528 |
| 26                        | C  | -0.146129 | 0.039236  |
| 27                        | C  | -0.146130 | 0.039236  |
| 28                        | C  | -0.146131 | 0.039235  |
| 29                        | C  | -0.146130 | 0.039235  |
| 30                        | C  | -0.146129 | 0.039236  |
| 31                        | C  | -0.146130 | 0.039236  |
| 32                        | C  | -0.146131 | 0.039235  |
| 33                        | C  | -0.146130 | 0.039236  |
| 34                        | C  | -0.072620 | 0.012694  |
| 35                        | H  | 0.125103  | -0.001256 |
| 36                        | C  | -0.072619 | 0.012694  |
| 37                        | H  | 0.125103  | -0.001256 |
| 38                        | C  | -0.072619 | 0.012694  |
| 39                        | H  | 0.125103  | -0.001256 |
| 40                        | C  | -0.072619 | 0.012694  |
| 41                        | H  | 0.125103  | -0.001256 |
| 42                        | C  | -0.072620 | 0.012694  |
| 43                        | H  | 0.125104  | -0.001256 |
| 44                        | C  | -0.072619 | 0.012694  |
| 45                        | H  | 0.125103  | -0.001256 |
| 46                        | C  | -0.072619 | 0.012694  |
| 47                        | H  | 0.125103  | -0.001256 |
| 48                        | C  | -0.072619 | 0.012694  |
| 49                        | H  | 0.125103  | -0.001256 |
| 50                        | H  | 0.116895  | -0.001131 |
| 51                        | H  | 0.116896  | -0.001131 |
| 52                        | H  | 0.116896  | -0.001131 |
| 53                        | H  | 0.116896  | -0.001131 |
| 54                        | H  | 0.116896  | -0.001131 |
| 55                        | H  | 0.116895  | -0.001131 |
| 56                        | H  | 0.116896  | -0.001131 |
| 57                        | H  | 0.116896  | -0.001131 |
| 58                        | O  | -0.279147 | 0.889872  |
| 59                        | F  | -0.472231 | 0.025726  |
| Sum of Mulliken charges = |    | -0.00000  | 3.00000   |

$\Delta E(\text{multipl.}=2) = 59.0 \text{ кДж/моль}$   
 $\Delta E(\text{multipl.}=4) = 0.0 \text{ кДж/моль}$   
 $\Delta E(\text{multipl.}=6) = 183.8 \text{ кДж/моль}$   
Alpha occupied eigenvalues (highest) = -5.7497451 eV  
Alpha virtual eigenvalues (lowest) = -3.2752677 eV  
Beta occupied eigenvalues (highest) = -6.3848265 eV  
Beta virtual eigenvalues (lowest) = -4.5993063 eV

<S\*\*2>= 3.8007

# Summary of Natural Population Analysis:

|      |    | Natural Population |          |         |         |          |
|------|----|--------------------|----------|---------|---------|----------|
| Atom | No | Natural Charge     | Core     | Valence | Rydberg | Total    |
| Fe   | 1  | 0.21202            | 17.99133 | 7.75922 | 0.03743 | 25.78798 |
| N    | 2  | -0.33099           | 1.99919  | 5.30421 | 0.02759 | 7.33099  |
| N    | 3  | -0.33099           | 1.99919  | 5.30421 | 0.02759 | 7.33099  |
| N    | 4  | -0.33099           | 1.99919  | 5.30421 | 0.02759 | 7.33099  |
| N    | 5  | -0.33100           | 1.99919  | 5.30421 | 0.02759 | 7.33100  |
| C    | 6  | 0.44916            | 1.99922  | 3.52881 | 0.02282 | 5.55084  |
| C    | 7  | 0.44916            | 1.99922  | 3.52881 | 0.02282 | 5.55084  |
| C    | 8  | 0.44916            | 1.99922  | 3.52881 | 0.02282 | 5.55084  |
| C    | 9  | 0.44916            | 1.99922  | 3.52881 | 0.02282 | 5.55084  |
| C    | 10 | 0.44916            | 1.99922  | 3.52881 | 0.02282 | 5.55084  |
| C    | 11 | 0.44916            | 1.99922  | 3.52881 | 0.02282 | 5.55084  |
| C    | 12 | 0.44916            | 1.99922  | 3.52881 | 0.02282 | 5.55084  |
| C    | 13 | 0.44916            | 1.99922  | 3.52881 | 0.02282 | 5.55084  |
| N    | 14 | -0.44054           | 1.99933  | 5.42510 | 0.01611 | 7.44054  |
| N    | 15 | -0.44054           | 1.99933  | 5.42510 | 0.01611 | 7.44054  |
| N    | 16 | -0.44054           | 1.99933  | 5.42510 | 0.01611 | 7.44054  |
| N    | 17 | -0.44054           | 1.99933  | 5.42510 | 0.01611 | 7.44054  |
| C    | 18 | -0.08240           | 1.99901  | 4.06617 | 0.01721 | 6.08240  |

|   |    |          |         |         |         |         |
|---|----|----------|---------|---------|---------|---------|
| C | 19 | -0.08239 | 1.99901 | 4.06617 | 0.01721 | 6.08239 |
| C | 20 | -0.08239 | 1.99901 | 4.06617 | 0.01721 | 6.08239 |
| C | 21 | -0.08239 | 1.99901 | 4.06617 | 0.01721 | 6.08239 |
| C | 22 | -0.08240 | 1.99901 | 4.06617 | 0.01721 | 6.08240 |
| C | 23 | -0.08239 | 1.99901 | 4.06617 | 0.01721 | 6.08239 |
| C | 24 | -0.08239 | 1.99901 | 4.06617 | 0.01721 | 6.08239 |
| C | 25 | -0.08240 | 1.99901 | 4.06617 | 0.01721 | 6.08240 |
| C | 26 | -0.15777 | 1.99912 | 4.14500 | 0.01366 | 6.15777 |
| C | 27 | -0.15777 | 1.99912 | 4.14500 | 0.01366 | 6.15777 |
| C | 28 | -0.15777 | 1.99912 | 4.14500 | 0.01366 | 6.15777 |
| C | 29 | -0.15777 | 1.99912 | 4.14500 | 0.01366 | 6.15777 |
| C | 30 | -0.15777 | 1.99912 | 4.14500 | 0.01366 | 6.15777 |
| C | 31 | -0.15777 | 1.99912 | 4.14500 | 0.01366 | 6.15777 |
| C | 32 | -0.15777 | 1.99912 | 4.14500 | 0.01366 | 6.15777 |
| C | 33 | -0.15777 | 1.99912 | 4.14500 | 0.01366 | 6.15777 |
| C | 34 | -0.19709 | 1.99925 | 4.18397 | 0.01387 | 6.19709 |
| H | 35 | 0.23287  | 0.00000 | 0.76546 | 0.00167 | 0.76713 |
| C | 36 | -0.19709 | 1.99925 | 4.18397 | 0.01387 | 6.19709 |
| H | 37 | 0.23287  | 0.00000 | 0.76546 | 0.00167 | 0.76713 |
| C | 38 | -0.19709 | 1.99925 | 4.18397 | 0.01387 | 6.19709 |
| H | 39 | 0.23287  | 0.00000 | 0.76546 | 0.00167 | 0.76713 |
| C | 40 | -0.19709 | 1.99925 | 4.18397 | 0.01387 | 6.19709 |
| H | 41 | 0.23287  | 0.00000 | 0.76546 | 0.00167 | 0.76713 |
| C | 42 | -0.19709 | 1.99925 | 4.18397 | 0.01387 | 6.19709 |
| H | 43 | 0.23287  | 0.00000 | 0.76546 | 0.00167 | 0.76713 |
| C | 44 | -0.19709 | 1.99925 | 4.18397 | 0.01387 | 6.19709 |
| H | 45 | 0.23287  | 0.00000 | 0.76546 | 0.00167 | 0.76713 |
| C | 46 | -0.19709 | 1.99925 | 4.18397 | 0.01387 | 6.19709 |
| H | 47 | 0.23287  | 0.00000 | 0.76546 | 0.00167 | 0.76713 |
| C | 48 | -0.19709 | 1.99925 | 4.18397 | 0.01387 | 6.19709 |
| H | 49 | 0.23287  | 0.00000 | 0.76546 | 0.00167 | 0.76713 |
| H | 50 | 0.21902  | 0.00000 | 0.77986 | 0.00112 | 0.78098 |
| H | 51 | 0.21902  | 0.00000 | 0.77986 | 0.00112 | 0.78098 |
| H | 52 | 0.21902  | 0.00000 | 0.77986 | 0.00112 | 0.78098 |
| H | 53 | 0.21902  | 0.00000 | 0.77986 | 0.00112 | 0.78098 |
| H | 54 | 0.21902  | 0.00000 | 0.77986 | 0.00112 | 0.78098 |
| H | 55 | 0.21902  | 0.00000 | 0.77986 | 0.00112 | 0.78098 |

|           |    |          |           |           |         |           |
|-----------|----|----------|-----------|-----------|---------|-----------|
| H         | 56 | 0.21902  | 0.00000   | 0.77986   | 0.00112 | 0.78098   |
| H         | 57 | 0.21902  | 0.00000   | 0.77986   | 0.00112 | 0.78098   |
| O         | 58 | -0.29117 | 1.99993   | 6.28485   | 0.00639 | 8.29117   |
| F         | 59 | -0.54506 | 1.99998   | 7.54282   | 0.00226 | 9.54506   |
| =====     |    |          |           |           |         |           |
| * Total * |    | 0.00000  | 101.95811 | 204.25817 | 0.78372 | 307.00000 |

NATURAL POPULATIONS: Natural atomic orbital occupancies

| NAO   | Atom | No | lang | Type(AO) | Occupancy |
|-------|------|----|------|----------|-----------|
| ----- |      |    |      |          |           |
| 1     | Fe   | 1  | S    | Cor( 1S) | 2.00000   |
| 2     | Fe   | 1  | S    | Cor( 2S) | 2.00000   |
| 3     | Fe   | 1  | S    | Cor( 3S) | 1.99626   |
| 4     | Fe   | 1  | S    | Val( 4S) | 0.27834   |
| 5     | Fe   | 1  | S    | Ryd( 5S) | 0.00105   |
| 6     | Fe   | 1  | S    | Ryd( 6S) | 0.00050   |
| 7     | Fe   | 1  | px   | Cor( 2p) | 2.00000   |
| 8     | Fe   | 1  | px   | Cor( 3p) | 1.99856   |
| 9     | Fe   | 1  | px   | Val( 4p) | 0.25037   |
| 10    | Fe   | 1  | px   | Ryd( 5p) | 0.00040   |
| 11    | Fe   | 1  | py   | Cor( 2p) | 2.00000   |
| 12    | Fe   | 1  | py   | Cor( 3p) | 1.99856   |
| 13    | Fe   | 1  | py   | Val( 4p) | 0.25037   |
| 14    | Fe   | 1  | py   | Ryd( 5p) | 0.00040   |
| 15    | Fe   | 1  | pz   | Cor( 2p) | 2.00000   |
| 16    | Fe   | 1  | pz   | Cor( 3p) | 1.99796   |
| 17    | Fe   | 1  | pz   | Val( 4p) | 0.23233   |
| 18    | Fe   | 1  | pz   | Ryd( 5p) | 0.00207   |
| 19    | Fe   | 1  | dxy  | Val( 3d) | 1.98761   |
| 20    | Fe   | 1  | dxy  | Ryd( 4d) | 0.00453   |
| 21    | Fe   | 1  | dxy  | Ryd( 5d) | 0.00059   |
| 22    | Fe   | 1  | dxz  | Val( 3d) | 1.46458   |
| 23    | Fe   | 1  | dxz  | Ryd( 4d) | 0.00820   |
| 24    | Fe   | 1  | dxz  | Ryd( 5d) | 0.00013   |
| 25    | Fe   | 1  | dyz  | Val( 3d) | 1.46458   |

|    |    |   |                   |          |         |
|----|----|---|-------------------|----------|---------|
| 26 | Fe | 1 | d <sub>yz</sub>   | Ryd( 4d) | 0.00820 |
| 27 | Fe | 1 | d <sub>yz</sub>   | Ryd( 5d) | 0.00013 |
| 28 | Fe | 1 | d <sub>x2y2</sub> | Val( 3d) | 0.83362 |
| 29 | Fe | 1 | d <sub>x2y2</sub> | Ryd( 4d) | 0.00378 |
| 30 | Fe | 1 | d <sub>x2y2</sub> | Ryd( 5d) | 0.00005 |
| 31 | Fe | 1 | d <sub>z2</sub>   | Val( 3d) | 0.99741 |
| 32 | Fe | 1 | d <sub>z2</sub>   | Ryd( 4d) | 0.00729 |
| 33 | Fe | 1 | d <sub>z2</sub>   | Ryd( 5d) | 0.00011 |

# NBO Analysis Data for [FeL3(O)F]

OPBE/TZVP

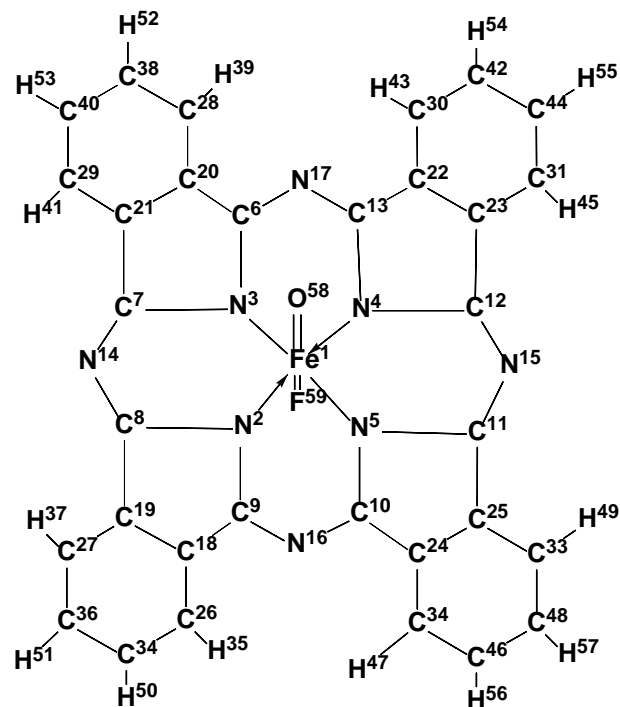

Dipole moment: = 0.6717 Debye

Mulliken charges and spin densities:

|                           |    |           |           |
|---------------------------|----|-----------|-----------|
| 1                         | Fe | -0.318788 | 0.996387  |
| 2                         | N  | 0.443238  | 0.003997  |
| 3                         | N  | 0.431341  | 0.004996  |
| 4                         | N  | 0.442177  | 0.014215  |
| 5                         | N  | 0.431336  | 0.004959  |
| 6                         | C  | -0.128201 | -0.103868 |
| 7                         | C  | -0.145149 | -0.068883 |
| 8                         | C  | -0.141831 | -0.070804 |
| 9                         | C  | -0.142012 | -0.070700 |
| 10                        | C  | -0.144966 | -0.068779 |
| 11                        | C  | -0.128347 | -0.103780 |
| 12                        | C  | -0.143763 | -0.102094 |
| 13                        | C  | -0.143628 | -0.102193 |
| 14                        | N  | 0.255303  | 0.022811  |
| 15                        | N  | 0.254912  | 0.030698  |
| 16                        | N  | 0.255297  | 0.022787  |
| 17                        | N  | 0.254911  | 0.030721  |
| 18                        | C  | 0.144518  | 0.012120  |
| 19                        | C  | 0.144431  | 0.012174  |
| 20                        | C  | 0.136028  | 0.022723  |
| 21                        | C  | 0.146367  | 0.005594  |
| 22                        | C  | 0.145208  | 0.016995  |
| 23                        | C  | 0.145349  | 0.016932  |
| 24                        | C  | 0.146230  | 0.005574  |
| 25                        | C  | 0.136076  | 0.022717  |
| 26                        | C  | -0.357196 | -0.024153 |
| 27                        | C  | -0.357247 | -0.024190 |
| 28                        | C  | -0.352264 | -0.035181 |
| 29                        | C  | -0.352961 | -0.022116 |
| 30                        | C  | -0.354793 | -0.033555 |
| 31                        | C  | -0.354800 | -0.033518 |
| 32                        | C  | -0.352970 | -0.022083 |
| 33                        | C  | -0.352175 | -0.035158 |
| 34                        | C  | -0.008296 | -0.007122 |
| 35                        | H  | 0.054601  | 0.001042  |
| 36                        | C  | -0.008275 | -0.007074 |
| 37                        | H  | 0.054593  | 0.001045  |
| 38                        | C  | -0.009470 | -0.000655 |
| 39                        | H  | 0.055499  | 0.001632  |
| 40                        | C  | -0.007704 | -0.017342 |
| 41                        | H  | 0.056251  | 0.000793  |
| 42                        | C  | -0.008152 | -0.010593 |
| 43                        | H  | 0.056009  | 0.001406  |
| 44                        | C  | -0.008145 | -0.010642 |
| 45                        | H  | 0.056014  | 0.001404  |
| 46                        | C  | -0.007691 | -0.017339 |
| 47                        | H  | 0.056246  | 0.000791  |
| 48                        | C  | -0.009498 | -0.000638 |
| 49                        | H  | 0.055509  | 0.001631  |
| 50                        | H  | 0.057439  | 0.000701  |
| 51                        | H  | 0.057438  | 0.000698  |
| 52                        | H  | 0.058049  | 0.000356  |
| 53                        | H  | 0.058271  | 0.001404  |
| 54                        | H  | 0.058605  | 0.001051  |
| 55                        | H  | 0.058606  | 0.001054  |
| 56                        | H  | 0.058267  | 0.001404  |
| 57                        | H  | 0.058047  | 0.000355  |
| 58                        | O  | -0.133317 | 0.701514  |
| 59                        | F  | -0.350527 | 0.027777  |
| Sum of Mulliken charges = |    | -0.00000  | 1.00000   |

$\Delta E(\text{multipl.}=2) = 0.0 \text{ кДж/моль}$   
 $\Delta E(\text{multipl.}=4) = 1.1 \text{ кДж/моль}$   
 $\Delta E(\text{multipl.}=6) = 134.1 \text{ кДж/моль}$   
Alpha occupied eigenvalues (highest) = -4.9927629 eV  
Alpha virtual eigenvalues (lowest) = -4.9905861 eV  
Beta occupied eigenvalues (highest) = -5.1737094 eV  
Beta virtual eigenvalues (lowest) = -3.7136208 eV

<S\*\*2>= 1.1656

# Summary of Natural Population Analysis:

|      |    | Natural Population |          |         |         |          |
|------|----|--------------------|----------|---------|---------|----------|
| Atom | No | Natural Charge     | Core     | Valence | Rydberg | Total    |
| Fe   | 1  | 0.10341            | 17.99170 | 7.87722 | 0.02766 | 25.89659 |
| N    | 2  | -0.28508           | 1.99918  | 5.25885 | 0.02705 | 7.28508  |
| N    | 3  | -0.28613           | 1.99918  | 5.26011 | 0.02684 | 7.28613  |
| N    | 4  | -0.28854           | 1.99918  | 5.26206 | 0.02729 | 7.28854  |
| N    | 5  | -0.28613           | 1.99918  | 5.26011 | 0.02684 | 7.28613  |
| C    | 6  | 0.38644            | 1.99921  | 3.59414 | 0.02022 | 5.61356  |
| C    | 7  | 0.37738            | 1.99921  | 3.60312 | 0.02029 | 5.62262  |
| C    | 8  | 0.38024            | 1.99921  | 3.60037 | 0.02018 | 5.61976  |
| C    | 9  | 0.38024            | 1.99921  | 3.60038 | 0.02018 | 5.61976  |
| C    | 10 | 0.37738            | 1.99921  | 3.60313 | 0.02029 | 5.62262  |
| C    | 11 | 0.38644            | 1.99921  | 3.59414 | 0.02022 | 5.61356  |
| C    | 12 | 0.38588            | 1.99921  | 3.59462 | 0.02030 | 5.61412  |
| C    | 13 | 0.38587            | 1.99921  | 3.59462 | 0.02030 | 5.61413  |
| N    | 14 | -0.39451           | 1.99935  | 5.38049 | 0.01467 | 7.39451  |
| N    | 15 | -0.39686           | 1.99935  | 5.38281 | 0.01471 | 7.39686  |
| N    | 16 | -0.39451           | 1.99935  | 5.38050 | 0.01467 | 7.39451  |
| N    | 17 | -0.39686           | 1.99935  | 5.38281 | 0.01471 | 7.39686  |
| C    | 18 | -0.08008           | 1.99904  | 4.06554 | 0.01550 | 6.08008  |

|   |    |          |         |         |         |         |
|---|----|----------|---------|---------|---------|---------|
| C | 19 | -0.08009 | 1.99904 | 4.06554 | 0.01550 | 6.08009 |
| C | 20 | -0.08288 | 1.99904 | 4.06835 | 0.01548 | 6.08288 |
| C | 21 | -0.07731 | 1.99904 | 4.06271 | 0.01555 | 6.07731 |
| C | 22 | -0.08170 | 1.99904 | 4.06710 | 0.01556 | 6.08170 |
| C | 23 | -0.08169 | 1.99904 | 4.06709 | 0.01556 | 6.08169 |
| C | 24 | -0.07731 | 1.99904 | 4.06271 | 0.01555 | 6.07731 |
| C | 25 | -0.08287 | 1.99904 | 4.06835 | 0.01548 | 6.08287 |
| C | 26 | -0.17018 | 1.99913 | 4.15917 | 0.01187 | 6.17018 |
| C | 27 | -0.17017 | 1.99913 | 4.15917 | 0.01187 | 6.17017 |
| C | 28 | -0.16698 | 1.99913 | 4.15600 | 0.01185 | 6.16698 |
| C | 29 | -0.17067 | 1.99913 | 4.15966 | 0.01188 | 6.17067 |
| C | 30 | -0.16735 | 1.99913 | 4.15636 | 0.01186 | 6.16735 |
| C | 31 | -0.16735 | 1.99913 | 4.15637 | 0.01186 | 6.16735 |
| C | 32 | -0.17067 | 1.99913 | 4.15966 | 0.01188 | 6.17067 |
| C | 33 | -0.16698 | 1.99913 | 4.15599 | 0.01185 | 6.16698 |
| C | 34 | -0.20731 | 1.99926 | 4.19623 | 0.01182 | 6.20731 |
| H | 35 | 0.23660  | 0.00000 | 0.76154 | 0.00186 | 0.76340 |
| C | 36 | -0.20731 | 1.99926 | 4.19624 | 0.01182 | 6.20731 |
| H | 37 | 0.23660  | 0.00000 | 0.76154 | 0.00186 | 0.76340 |
| C | 38 | -0.20916 | 1.99926 | 4.19808 | 0.01182 | 6.20916 |
| H | 39 | 0.23701  | 0.00000 | 0.76113 | 0.00186 | 0.76299 |
| C | 40 | -0.20344 | 1.99926 | 4.19241 | 0.01177 | 6.20344 |
| H | 41 | 0.23740  | 0.00000 | 0.76074 | 0.00186 | 0.76260 |
| C | 42 | -0.20623 | 1.99926 | 4.19518 | 0.01179 | 6.20623 |
| H | 43 | 0.23719  | 0.00000 | 0.76095 | 0.00186 | 0.76281 |
| C | 44 | -0.20623 | 1.99926 | 4.19517 | 0.01179 | 6.20623 |
| H | 45 | 0.23719  | 0.00000 | 0.76095 | 0.00186 | 0.76281 |
| C | 46 | -0.20344 | 1.99926 | 4.19241 | 0.01177 | 6.20344 |
| H | 47 | 0.23740  | 0.00000 | 0.76074 | 0.00186 | 0.76260 |
| C | 48 | -0.20916 | 1.99926 | 4.19808 | 0.01182 | 6.20916 |
| H | 49 | 0.23701  | 0.00000 | 0.76113 | 0.00186 | 0.76299 |
| H | 50 | 0.22359  | 0.00000 | 0.77517 | 0.00124 | 0.77641 |
| H | 51 | 0.22359  | 0.00000 | 0.77516 | 0.00124 | 0.77641 |
| H | 52 | 0.22418  | 0.00000 | 0.77458 | 0.00124 | 0.77582 |
| H | 53 | 0.22398  | 0.00000 | 0.77479 | 0.00124 | 0.77602 |
| H | 54 | 0.22420  | 0.00000 | 0.77456 | 0.00124 | 0.77580 |
| H | 55 | 0.22420  | 0.00000 | 0.77456 | 0.00124 | 0.77580 |



|           |    |          |           |           |         |           |
|-----------|----|----------|-----------|-----------|---------|-----------|
| H         | 56 | 0.22398  | 0.00000   | 0.77478   | 0.00124 | 0.77602   |
| H         | 57 | 0.22418  | 0.00000   | 0.77458   | 0.00124 | 0.77582   |
| O         | 58 | -0.09032 | 1.99993   | 6.08380   | 0.00658 | 8.09032   |
| F         | 59 | -0.38609 | 1.99998   | 7.38374   | 0.00237 | 9.38609   |
| =====     |    |          |           |           |         |           |
| * Total * |    | -0.00000 | 101.95884 | 204.33746 | 0.70370 | 307.00000 |

NATURAL POPULATIONS: Natural atomic orbital occupancies

| NAO   | Atom | No | lang | Type(AO) | Occupancy |
|-------|------|----|------|----------|-----------|
| ----- |      |    |      |          |           |
| 1     | Fe   | 1  | S    | Cor( 1S) | 2.00000   |
| 2     | Fe   | 1  | S    | Cor( 2S) | 1.99999   |
| 3     | Fe   | 1  | S    | Cor( 3S) | 1.99646   |
| 4     | Fe   | 1  | S    | Val( 4S) | 0.29347   |
| 5     | Fe   | 1  | S    | Ryd( 5S) | 0.00131   |
| 6     | Fe   | 1  | S    | Ryd( 6S) | 0.00056   |
| 7     | Fe   | 1  | px   | Cor( 2p) | 2.00000   |
| 8     | Fe   | 1  | px   | Cor( 3p) | 1.99854   |
| 9     | Fe   | 1  | px   | Val( 4p) | 0.25203   |
| 10    | Fe   | 1  | px   | Ryd( 5p) | 0.00050   |
| 11    | Fe   | 1  | py   | Cor( 2p) | 2.00000   |
| 12    | Fe   | 1  | py   | Cor( 3p) | 1.99858   |
| 13    | Fe   | 1  | py   | Val( 4p) | 0.25181   |
| 14    | Fe   | 1  | py   | Ryd( 5p) | 0.00051   |
| 15    | Fe   | 1  | pz   | Cor( 2p) | 2.00000   |
| 16    | Fe   | 1  | pz   | Cor( 3p) | 1.99813   |
| 17    | Fe   | 1  | pz   | Val( 4p) | 0.23164   |
| 18    | Fe   | 1  | pz   | Ryd( 5p) | 0.00205   |
| 19    | Fe   | 1  | dxy  | Val( 3d) | 1.98468   |
| 20    | Fe   | 1  | dxy  | Ryd( 4d) | 0.00330   |
| 21    | Fe   | 1  | dxy  | Ryd( 5d) | 0.00045   |
| 22    | Fe   | 1  | dxz  | Val( 3d) | 1.46848   |
| 23    | Fe   | 1  | dxz  | Ryd( 4d) | 0.00682   |
| 24    | Fe   | 1  | dxz  | Ryd( 5d) | 0.00014   |
| 25    | Fe   | 1  | dyz  | Val( 3d) | 1.22864   |

|    |    |   |                   |          |         |
|----|----|---|-------------------|----------|---------|
| 26 | Fe | 1 | d <sub>yz</sub>   | Ryd( 4d) | 0.00286 |
| 27 | Fe | 1 | d <sub>yz</sub>   | Ryd( 5d) | 0.00009 |
| 28 | Fe | 1 | d <sub>x2y2</sub> | Val( 3d) | 1.04734 |
| 29 | Fe | 1 | d <sub>x2y2</sub> | Ryd( 4d) | 0.00312 |
| 30 | Fe | 1 | d <sub>x2y2</sub> | Ryd( 5d) | 0.00003 |
| 31 | Fe | 1 | d <sub>z2</sub>   | Val( 3d) | 1.11913 |
| 32 | Fe | 1 | d <sub>z2</sub>   | Ryd( 4d) | 0.00582 |
| 33 | Fe | 1 | d <sub>z2</sub>   | Ryd( 5d) | 0.00009 |

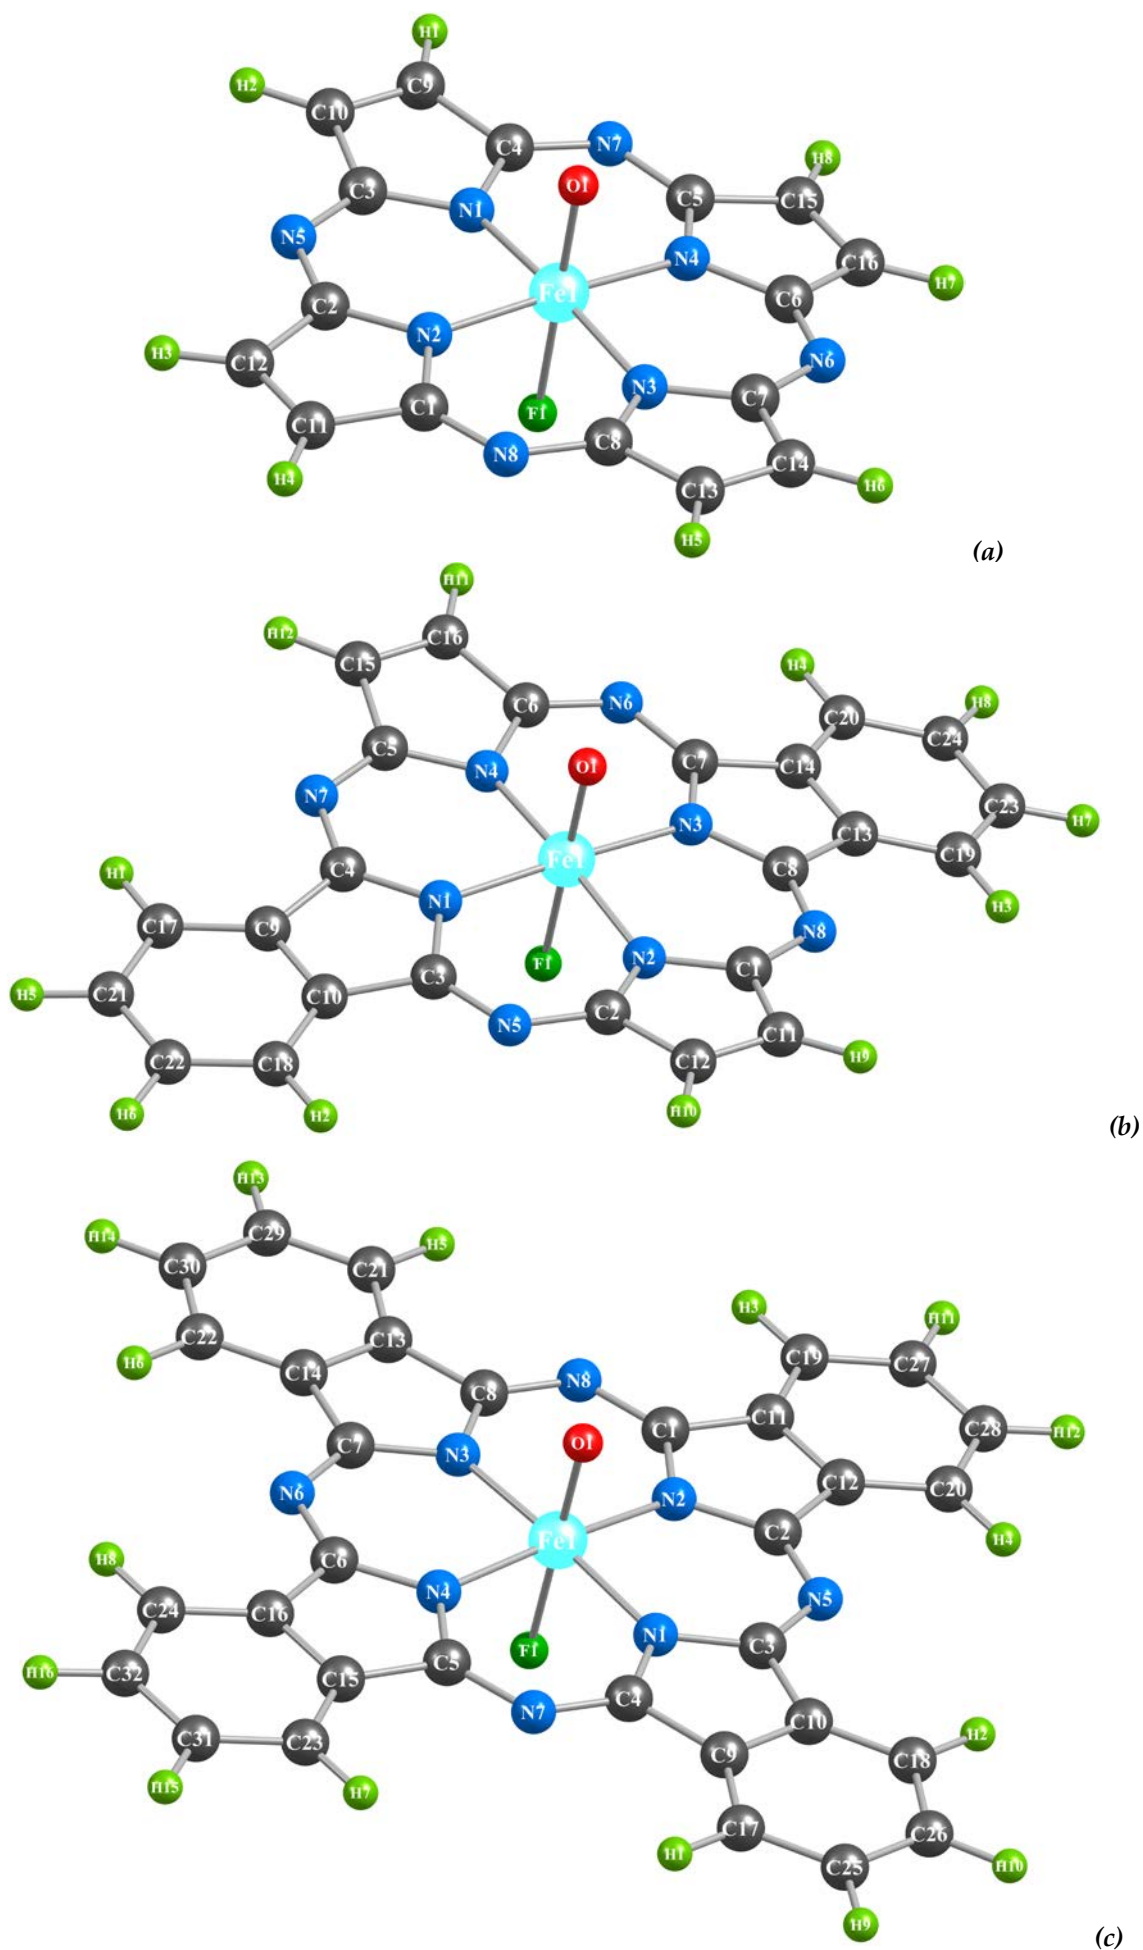

**Figure S1.** Molecular structures of the iron complexes of types **I-III** obtained by using quantum-chemical calculation by DFT OPBE/TZVP method: *a*: [FeL1(O)F], *b*: [FeL2(O)F], *c*: [FeL3(O)F].

|                                                                                     |                                                                                     |                                                                                       |
|-------------------------------------------------------------------------------------|-------------------------------------------------------------------------------------|---------------------------------------------------------------------------------------|
| 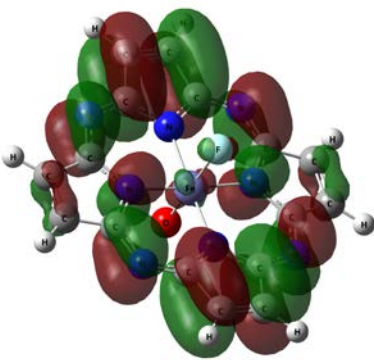   |    |    |
| LUMO (alpha)<br>(-4.091)                                                            | LUMO (alpha)<br>(-3.982)                                                            | LUMO (beta)<br>(-3.714)                                                               |
|    |    |    |
| LUMO (beta)<br>(-5.634)                                                             | LUMO (beta)<br>(-5.232)                                                             | LUMO (alpha)<br>(-4.991)                                                              |
|  |  |  |
| HOMO (alpha)<br>(-5.895)                                                            | HOMO (alpha)<br>(-5.425)                                                            | HOMO (alpha)<br>(-4.993)                                                              |
|  |  |  |
| HOMO (beta)<br>(-6.018)                                                             | HOMO (beta)<br>(-5.537)                                                             | HOMO (beta)<br>(-5.174)                                                               |
| [FeL1(O)F]                                                                          | [FeL2(O)F]                                                                          | [FeL3(O)F]                                                                            |

**Figure S2.** The pictures of HOMO and LUMO in the FeL1(O)F and [FeL2(O)F] (ground state – spin quartet,  $M_S = 4$ ), and [FeL3(O)F] (ground state – spin doublet,  $M_S = 4$ ) according to the DFT OPBE/TZVP method. The energies values of the given MOs (in brackets) are expressed in eV. The symbol “alpha” belongs to electron having spin (+1/2), symbol “beta”, to electron having spin (-1/2).
